# Supplementary material
Source: PubMed Central journal article supplement (PMC3662975)

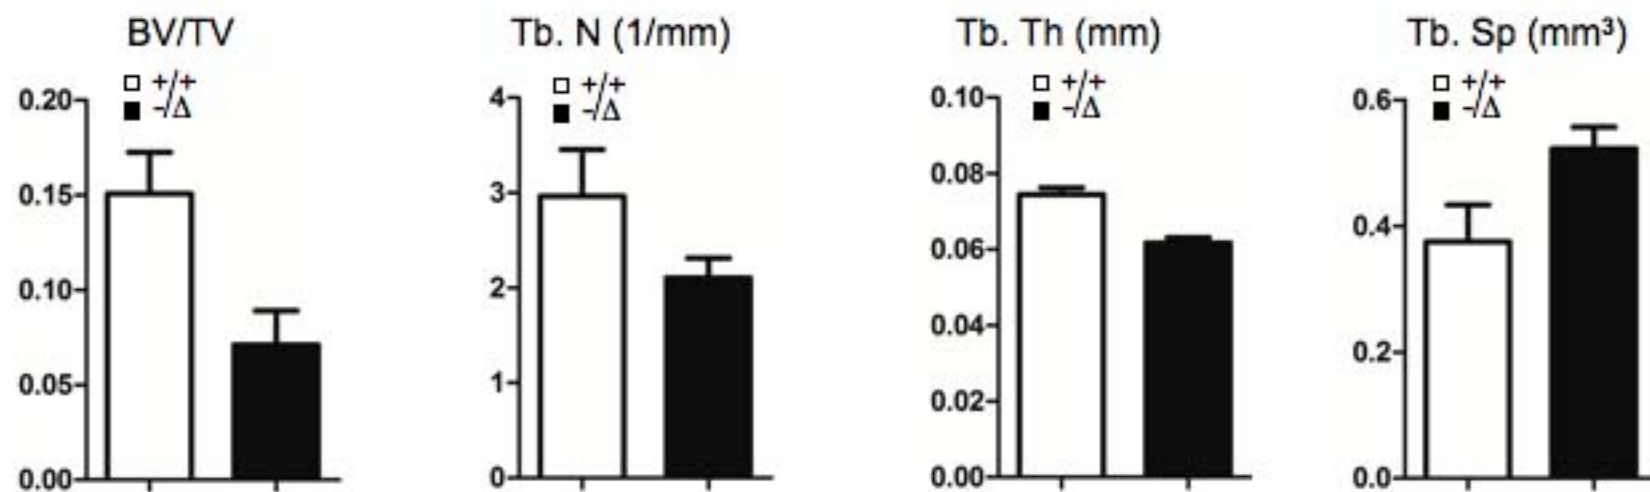

A

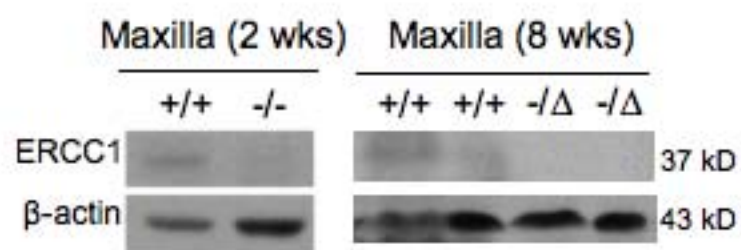

B

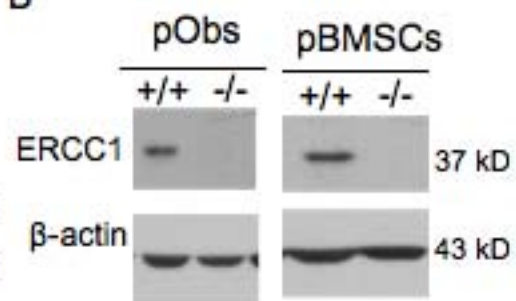

C

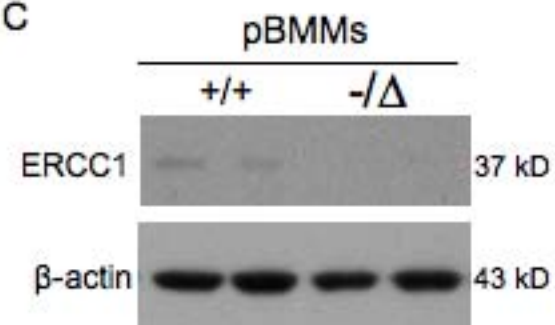

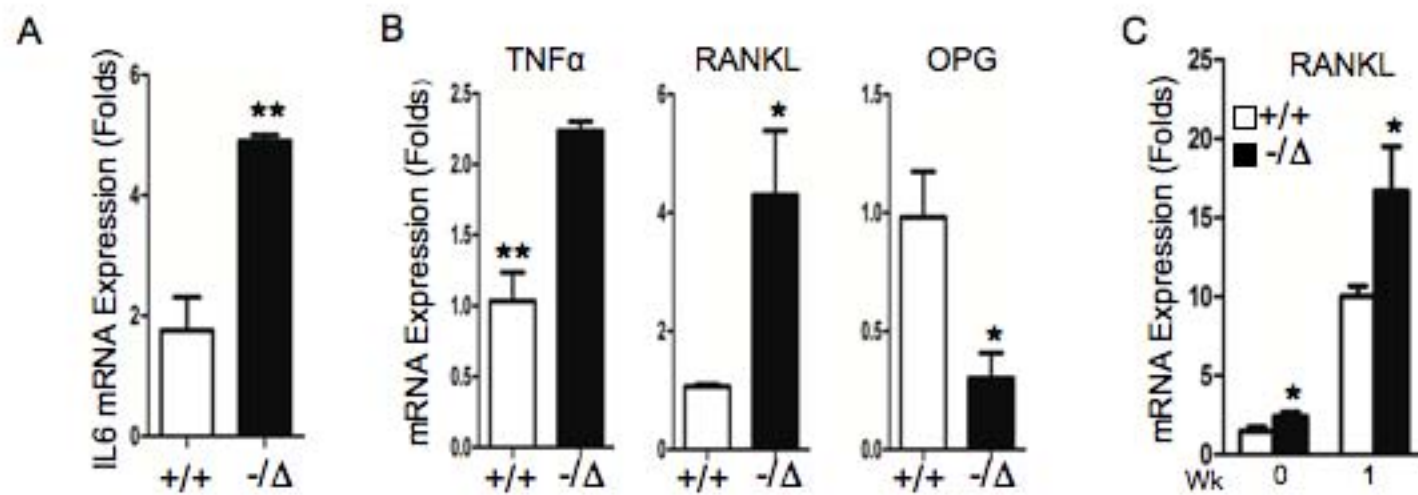

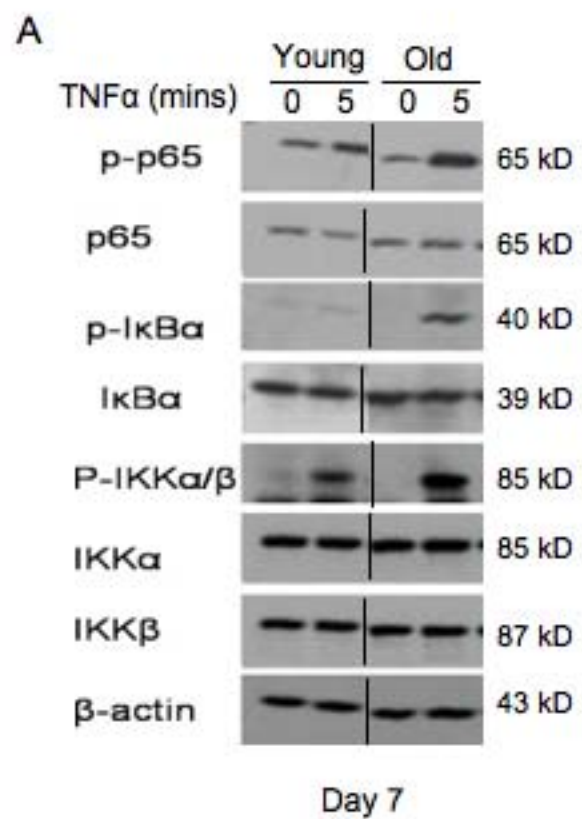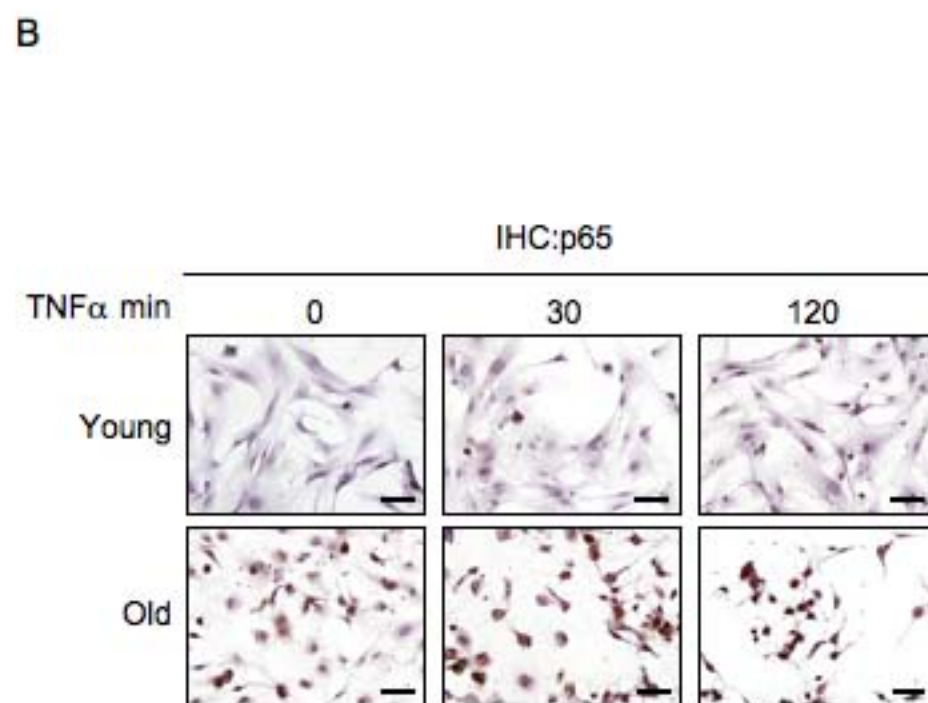

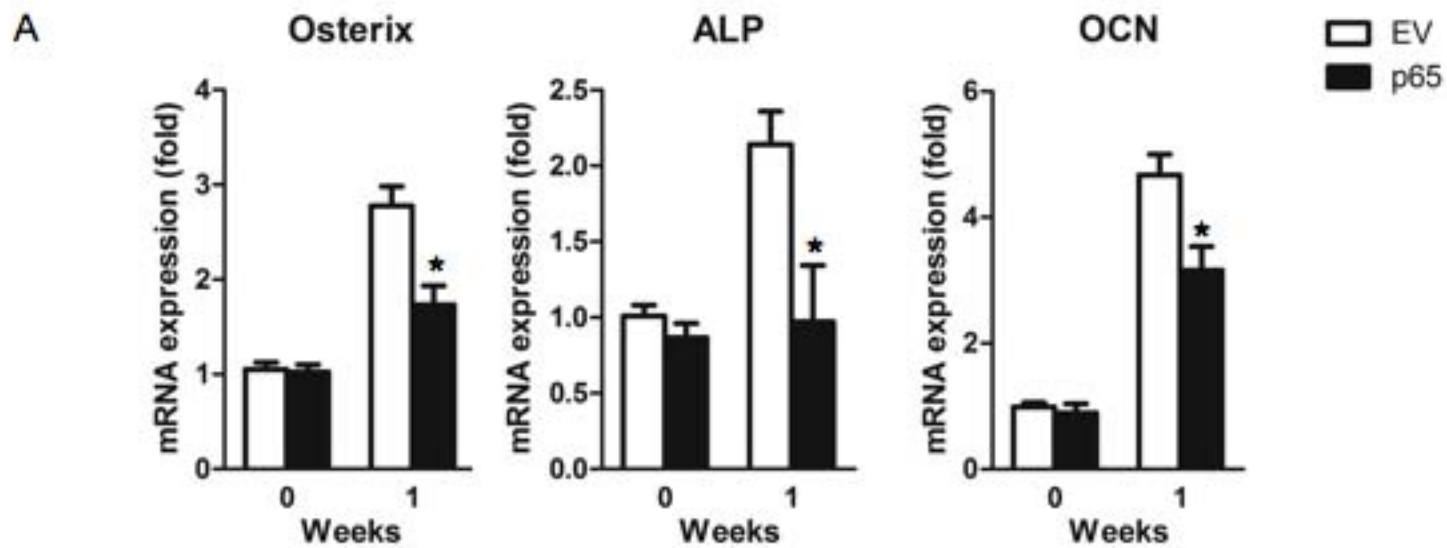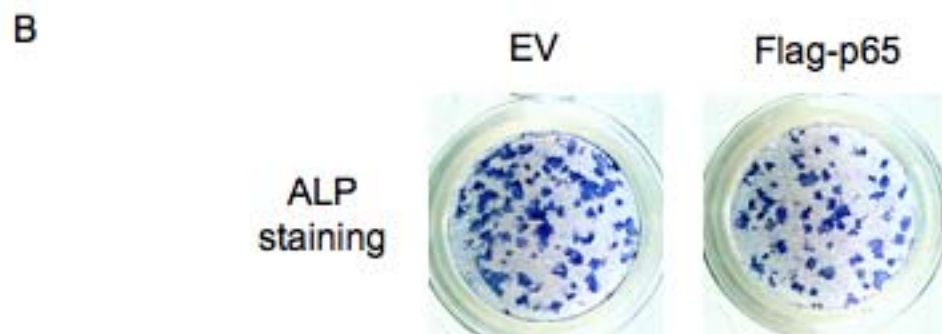

A

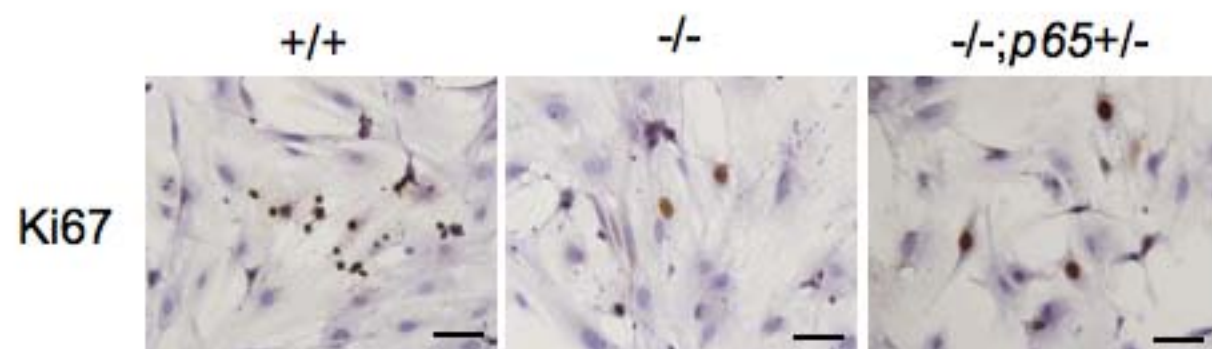

B

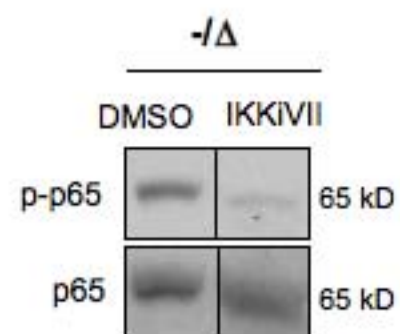

Supplement: NIHMS428399-supplement-Supp_Fig_S1-S6.pdf [file NIHMS428399-supplement-Supp_Fig_S1-S6.pdf]
